# Supplementary material for: Phosphorylation of SMAD3 in immune cells predicts survival of patients with early stage non-small cell lung cancer
Source: HighWire-hosted journal article supplement (doi:10.1136/jitc-2020-001469), 2021-02-01
Supplement: jitc-2020-001469supp001_data_supplement.xlsx [file jitc-2020-001469supp001_data_supplement.xlsx]

## Sheet: summarized_patient_data_edited
Sex	Histology	Stage	TNM_T	TNM_N	TNM_M	TNM_L	TNM_V	TNM_R	Grading	OS (month)	DFS (month)	ECOG
Male: 116	AC : 106	IA : 46	T1 : 1	N0: 137	M0: 197	L0 : 76	V0 : 143	R0: 188	G1 : 2	Min. : 12.40	Min. : 1.70	ECOG 0: 90
Female: 81	SQC: 91	IB : 49	T1a: 22	N1: 32		L1 : 84	V1 : 17	R1: 8	G2 : 56	1st Qu.: 23.20	1st Qu.: 18.80	ECOG 1: 74
		IIA : 31	T1b: 31	N2: 24		LX : 1	VX : 1	R2: 1	G3 : 137	Median : 31.80	Median : 26.40	ECOG 2: 11
		IIB : 28	T2a: 70	N3: 3		NA: 36	NA: 36		NA: 2	Mean : 32.99	Mean : 29.01	NA: 22
		IIIA: 40	T2b: 27	NX: 1						3rd Qu.: 43.00	3rd Qu.: 39.10
		IIIB: 3	T3 : 38							Max : 61.00	Max. : 61.00
			T4 : 8
NA = data not available, OS= overall survival, DFS = disease-free survival, AC= Adenocarcinoma, SQC= Squamous cell carcinoma, ECOG= Eastern Cooperative Oncology Group, Qu. = Quartile
