# Supplementary figures and images for: Phosphorylation of SMAD3 in immune cells predicts survival of patients with early stage non-small cell lung cancer
Source: HighWire-hosted journal article supplement (doi:10.1136/jitc-2020-001469), 2021-02-01

## Center vs Margin correlation (Pearson R)

0.00 0.25 0.50 0.75

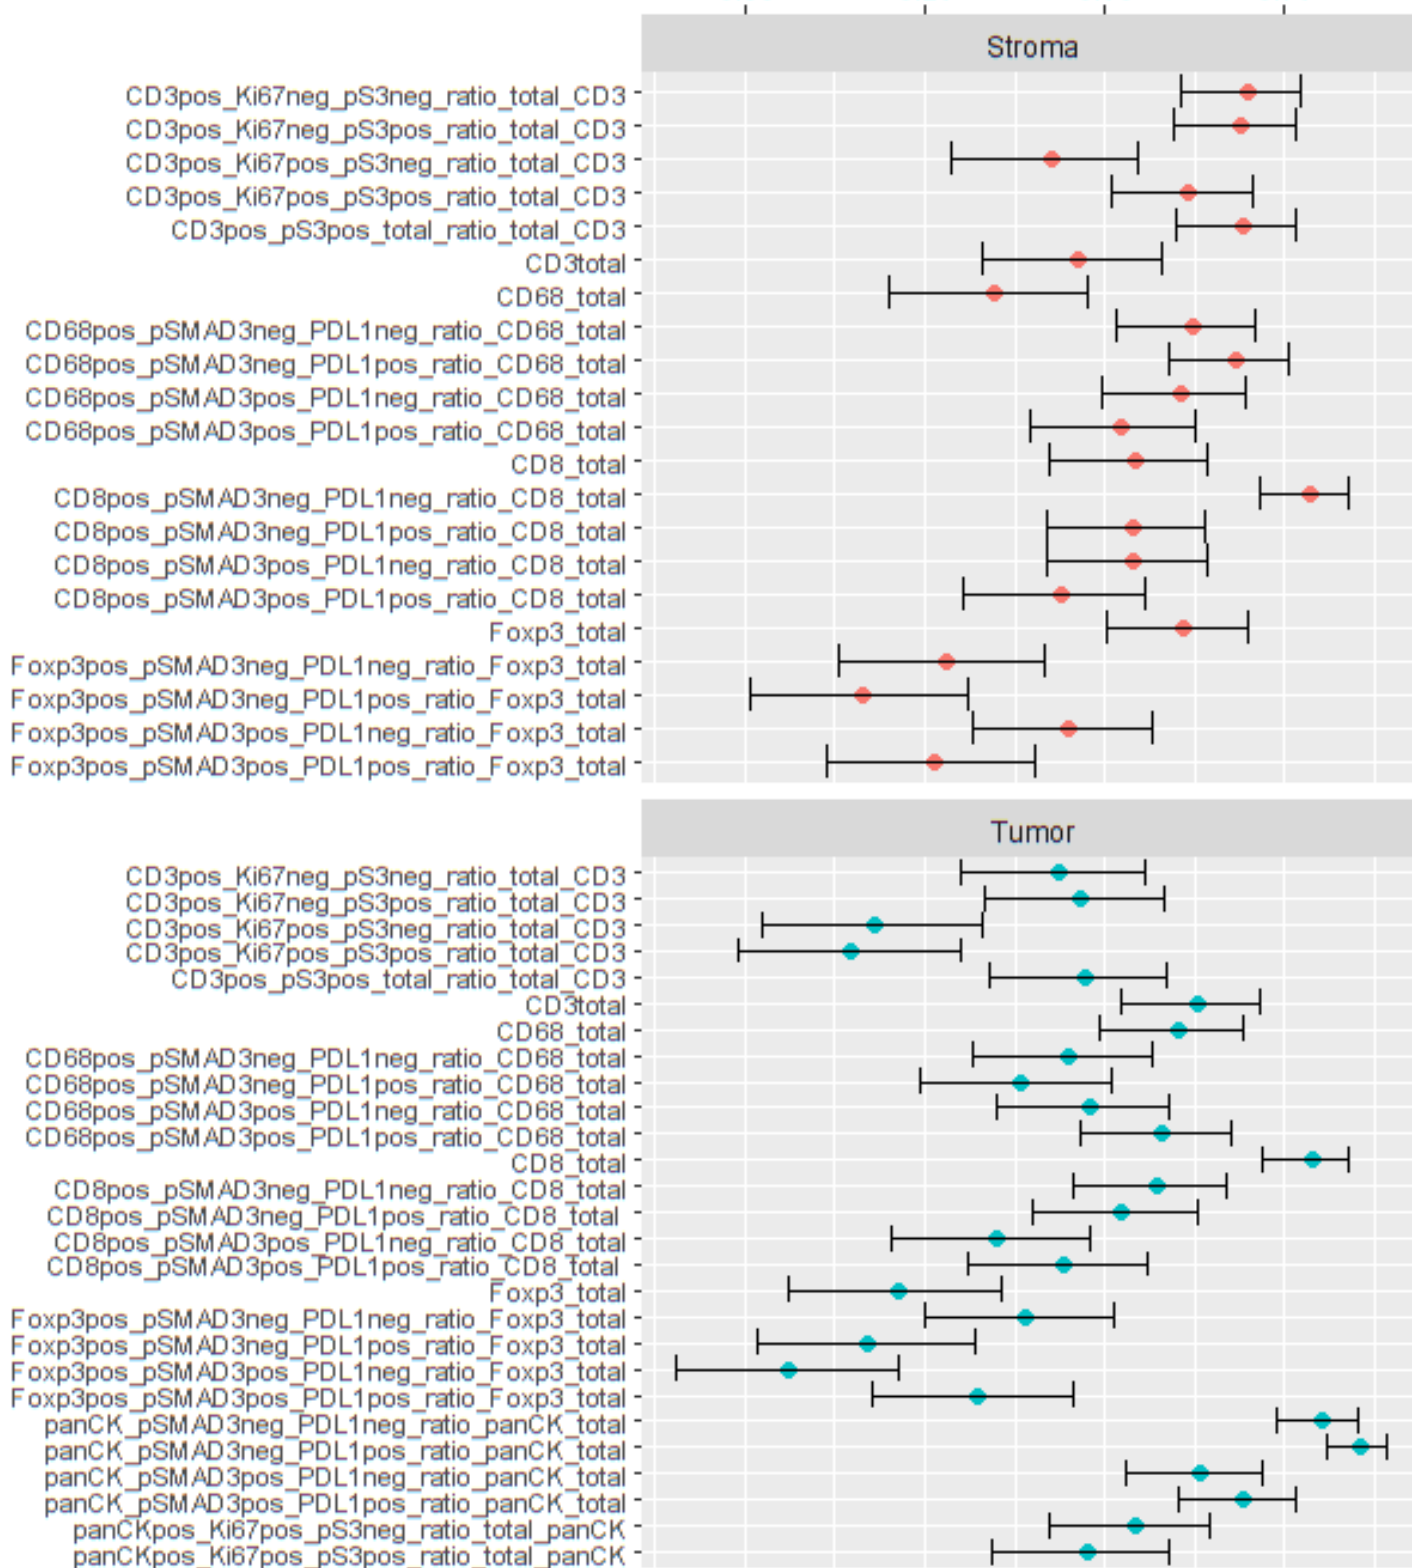

Supplement: jitc-2020-001469supp002_data_supplement.pdf [file jitc-2020-001469supp002_data_supplement.pdf]

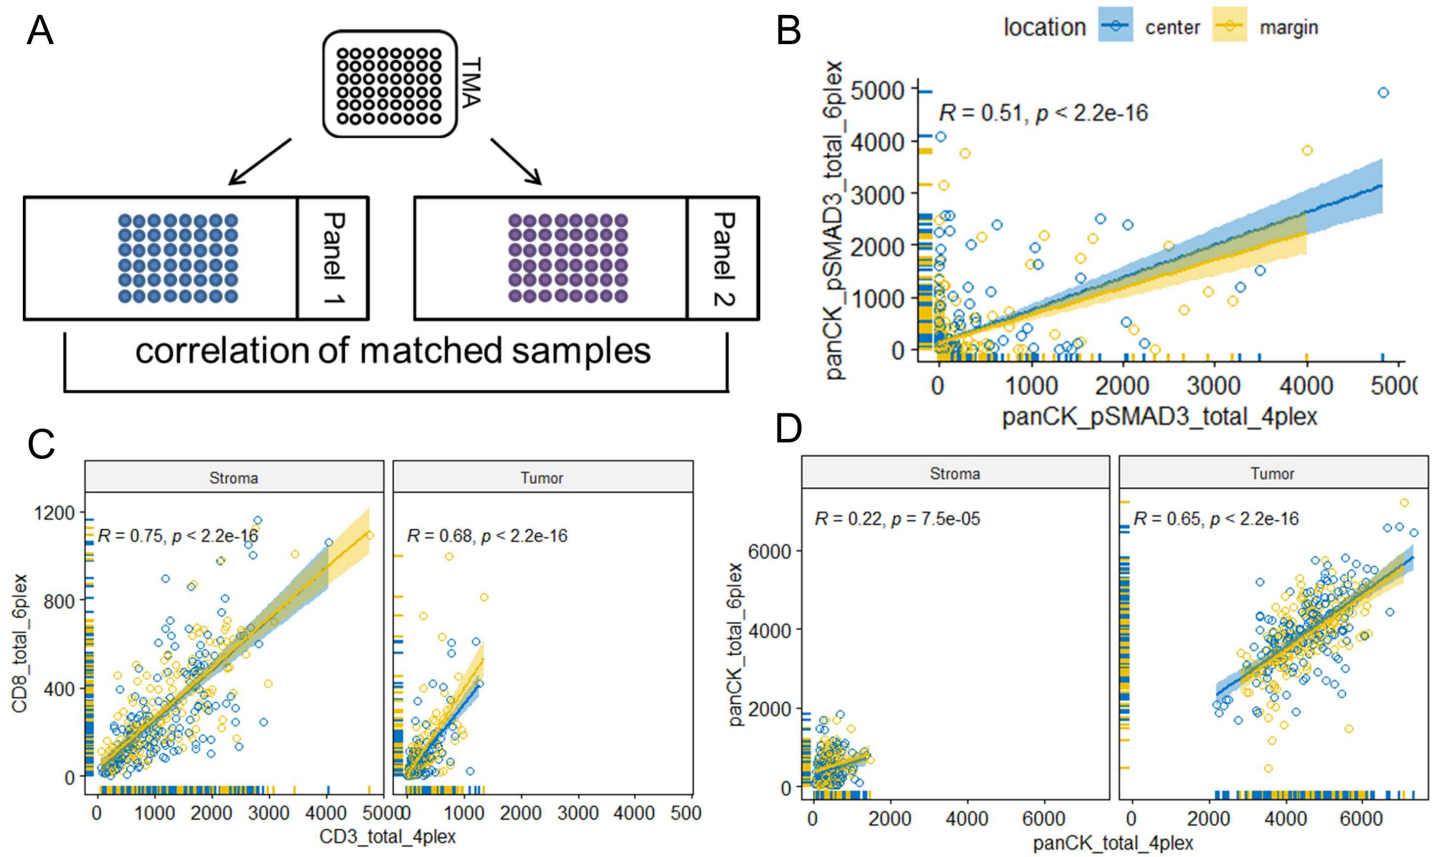

Supplement: jitc-2020-001469supp003_data_supplement.pdf [file jitc-2020-001469supp003_data_supplement.pdf]

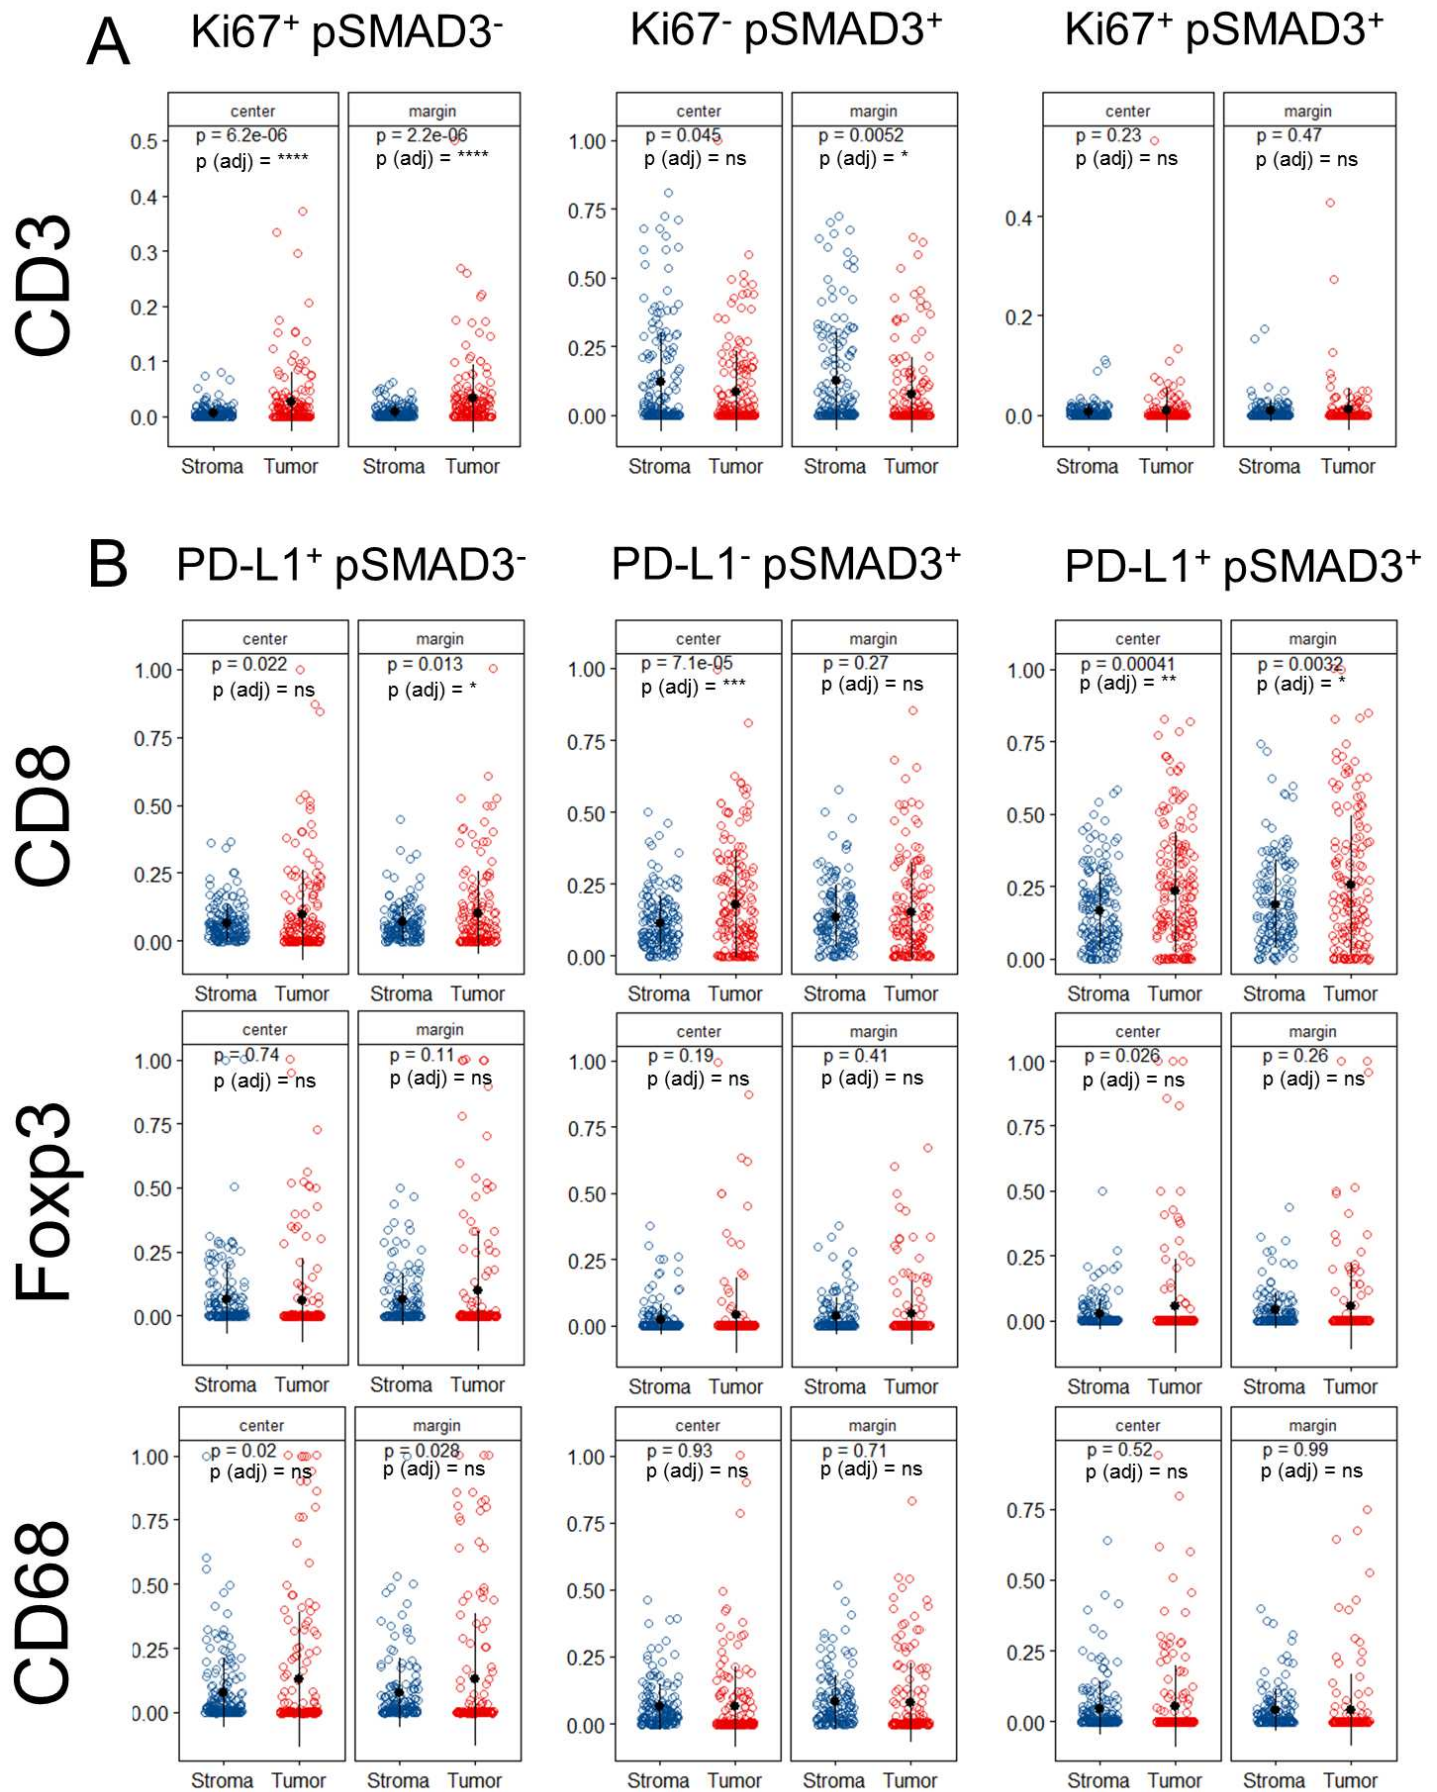

Supplement: jitc-2020-001469supp004_data_supplement.pdf [file jitc-2020-001469supp004_data_supplement.pdf]

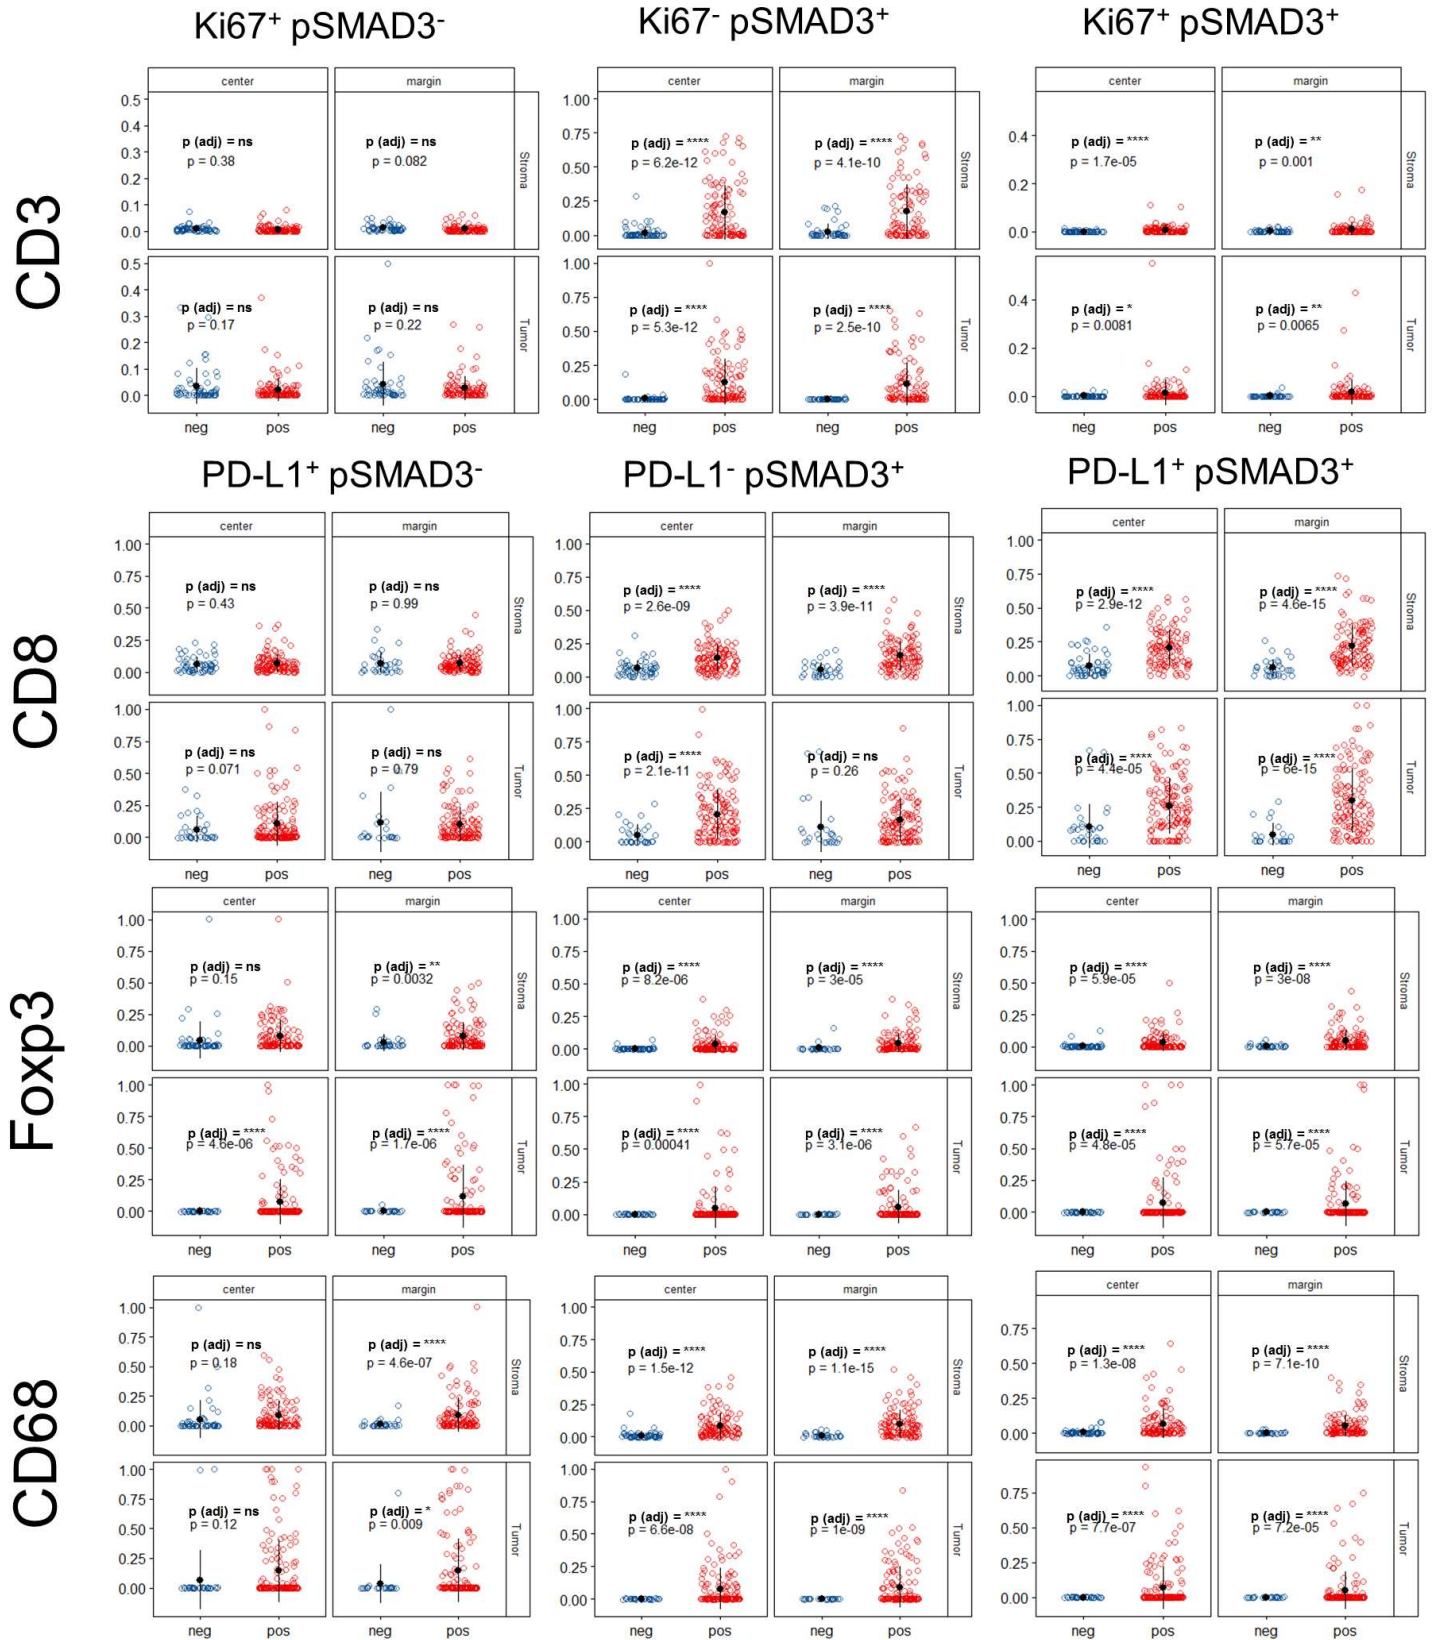

Supplement: jitc-2020-001469supp005_data_supplement.pdf [file jitc-2020-001469supp005_data_supplement.pdf]
